# Supplementary material for: AtOMA1 Affects the OXPHOS System and Plant Growth in Contrast to Other Newly Identified ATP-Independent Proteases in Arabidopsis Mitochondria
Source: PubMed Central journal article supplement (PMC5594102; doi:10.3389/fpls.2017.01543), 2017-09-07
Supplement: Image_1.pdf [file Image_1.pdf]

```

                *           20           *           4
MmImp1      : -----MLRGVLGKAFRLAGYTIQYG : 20
Imp1        : -----MTVGTLPIWSKTFSYAIRSL : 20
At1g53530   : -----MRMTFLSYLKQWRGTAKAFENVSIKFL : 30
At1g23465   : -----MTSPS-SSFWNTASREAMKSGMFVAKVY : 27
MmImp2      : -----MAQSQSWARRCFKAFCKGFFVAV : 23
Imp2        : -----MFRAGSSKR--FLRNTLIAISWV : 21
At2g31140   : MASISTWFRYMAHKLEYSLTLSLKSHRSNKLSRELIIQI : 39

                0           *           60           *
MmImp1      : CIAHCAFEYVGGVVMCSGSPMEPTIQNS-DIVFAENLSR : 58
Imp1        : CFLHIIHMYAYEFTETRGE SMLPTLSATNDYVHVLKNFQ : 59
At1g53530   : CLLHVTDRIIISTTHVHGPSMLPTLNLTGDVILAEHLSH : 69
At1g23465   : CFLHVTTNYLGF MAYAYGPSMIPTLHPSGNMLLAERISK : 66
MmImp2      : PVAVTFLDRVACVARVEGSSMQPSLNPG-GSQSSDVVLL : 61
Imp2        : PVLLTINNNVHIAQVKGTSMQPTLNQPTETLATDQVLL : 60
At2g31140   : ICKNLFYGKITYLHSDKGPMSPTMTANENTLLIRKIPI : 78

                80           *           100          *
MmImp1      : HFYGIQR-----GDIVIAKSPSPDKSNICKRVIGLEGD : 91
Imp1        : NGRGIKM-----GDCIVALKPTDPNHRICKRVTGMPGD : 92
At1g53530   : RFGKIGL-----GDVVLVRSRDPKRMVTKRILGLEGD : 102
At1g23465   : RYQKPSR-----GDIVVIRSPENPNKTPIKRVVGVVEGD : 99
MmImp2      : NHWKVRN-FEVQRGDIVSLVSPKNPEQKIIKRVIALEGD : 99
Imp2        : WKFGVKNPSNLSRDDIILFKAPTNPVKVYCKRVKGLPFD : 99
At2g31140   : ANTRFVF-----IGDAVVLKDPNDSKYLVRRLAAVEGF : 112

                120          *           140          *
MmImp1      : KILSTS-----PSDVFKSRSYVPTGHVWLEGD : 118
Imp1        : LVLVDPSTIVNYVGDVLDVEERFGTYIKVPEGHVWVTGD : 131
At1g53530   : RLTFADP-----LVGDASVSVLVPKGHVWIQGD : 131
At1g23465   : CISFVIDP-----VKSDSQTI VVPKGHVVFVQGD : 128
MmImp2      : IVRTIG-----HKNRLVKVPRGHMWVEGD : 123
Imp2        : TIDTKFP-----YPKPQVNLPRGHIWVEGD : 124
At2g31140   : EMVSGD-----EKEEPFVLEKNQCWVTAE : 136

                160          *           180          *
MmImp1      : N----LQNSTDSRYYGPIPYGLIRGRIFFK----- : 144
Imp1        : N----LSHSLDSRTYNALPMGLIMGKIVAANNFDKPFWD : 166
At1g53530   : N----LYASTDSRHFGPVPYSLIEGKALLR----- : 157
At1g23465   : Y----THNSRDSRNFGPVPYGLIQGRVLWR----- : 154
MmImp2      : H----HGHSFDSNSFGPVS LGLLHAHATHI----- : 149
Imp2        : N----YFHSIDSNTFGPIS SGLVIGKAITI----- : 150
At2g31140   : NQELKAKEAYDSRTFGPVS TADIVGRAIYC----- : 166

                200          *           220          *
MmImp1      : --IWPFSDFGFLRDSPNGQRFSD----- : 166
Imp1        : GSIRNIWGFKWINNTFLDVQAKSN----- : 190
At1g53530   : --VWPPEYFGSLR----- : 168
At1g23465   : --V----- : 155
MmImp2      : --LWPPERWQRLESVLPPEPCPLQTGEK----- : 175
Imp2        : --VWPPSRWGTDLKLTGRDCISKRAILE----- : 177
At2g31140   : --LRTAVDHGPVRNSQTAMGQDSPILAVELDVDEMAKNH : 203

MmImp1      : -- : -
Imp1        : -- : -
At1g53530   : -- : -
At1g23465   : -- : -
MmImp2      : -- : -
Imp2        : -- : -
At2g31140   : KA : 205

```

**Figure S1.** Multiple sequence alignment of the Imp family of proteases. The amino acid sequences of Imp1 and Imp2 from *S. cerevisiae*, MmImp1 and MmImp2 from mammals and the Arabidopsis homologs (At1g53530, At1g23465, At2g31140) were aligned with ClustalW. The Imp1 (RX5P) and Imp2 (NX5S) - specific motifs are colored in green and yellow, respectively.

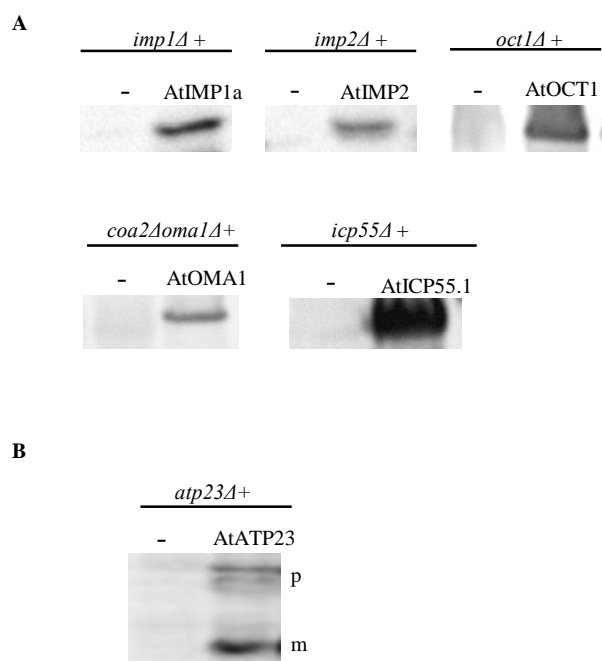

**Figure S2.** Immunodetection of plant proteases (AtIMP1a, AtIMP2, AtOCT1, AtOMA1, AtICP55.1 and AtATP23) in yeast mutants lacking the respective protease. Immunodetection was performed using anti-HA antibodies. **(A)** Isolated mitochondria from yeast mutant carrying HA-tagged version of plant protease. **(B)** Total protein extract from yeast mutant expressing AtATP23 fused with a mitochondrial targeting sequence derived from the yeast cytochrome b2 protein. p-precursor protein, m-mature protein, “-“ untransformed yeast mutant cells.

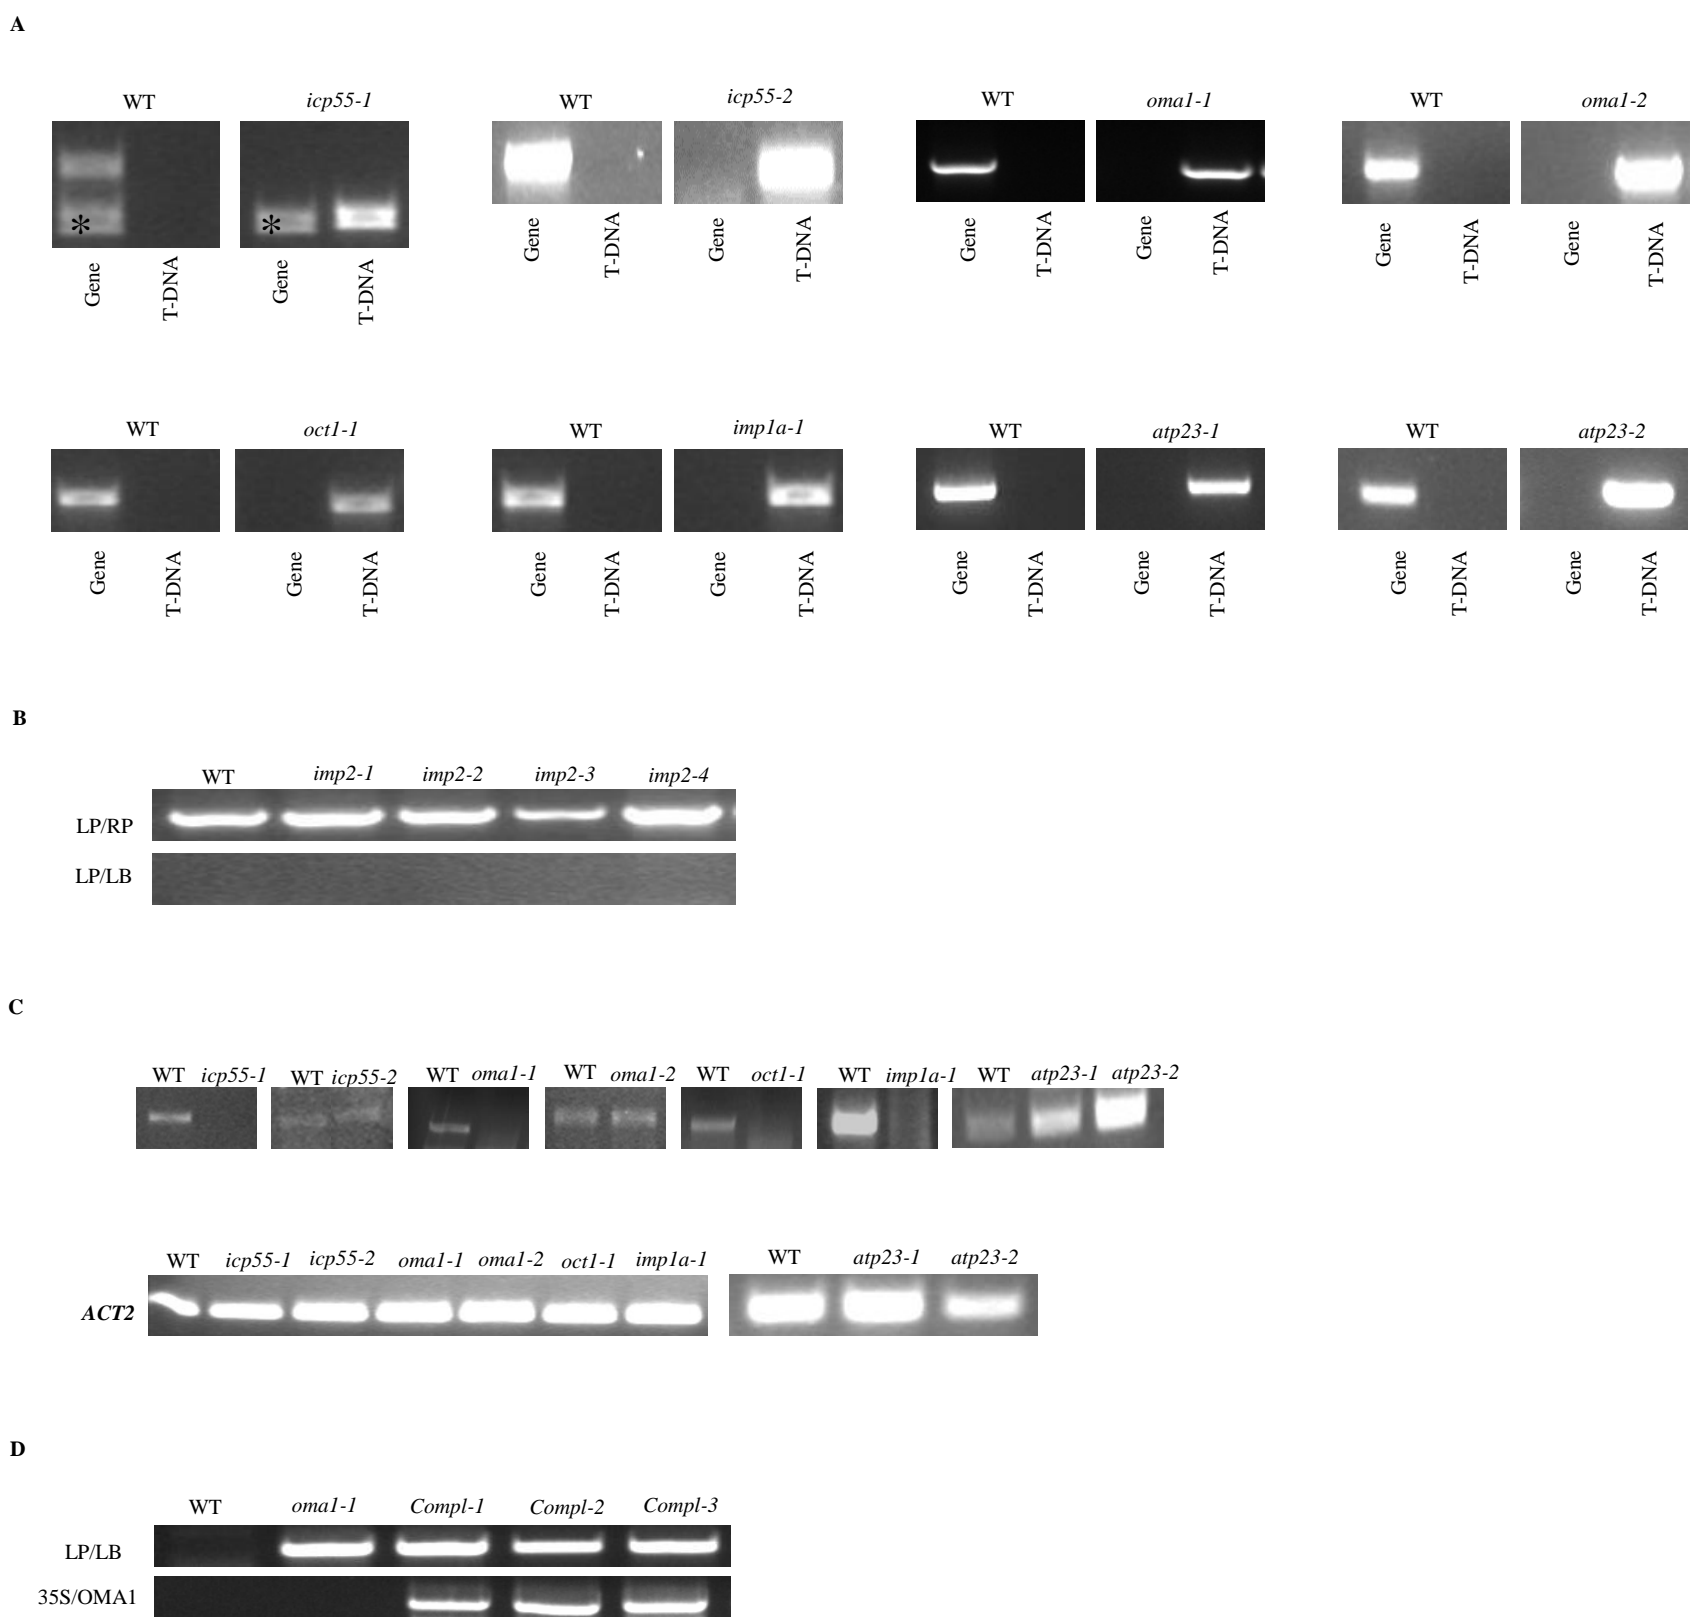

**Figure S3.** Characterization of T-DNA insertional mutants used in this work and AtOMA1- Complemented lines. **(A)** Homozygous T-DNA insertion plants were identified by PCR using the respective gene specific primer pair LP and RP (named as Gene) (Table S2) as well as the T-DNA specific primer pair LP and/or RP and LB (named as T-DNA) (Table S2); \*- unspecific band. **(B)** Lack of T-DNA verified with primers specific for T-DNA insertion (LP/LB) in *imp2* lines: SALK\_080262 (*imp2-1*), SALK\_080280 (*imp2-2*), SALK\_080264 (*imp2-3*), SALK\_080272 (*imp2-4*). **(C)** Analysis of expression of respective protease by RT-PCR in wild-type (WT) and homozygous mutant lines. Amplification of the transcript for the *ACT2* gene was used as a control. **(D)** Confirmation of three independent AtOMA1-Complemented lines (*Compl-1*, *Compl-2*, *Compl-3*) by PCR. The upper reaction was performed using primers specific to T-DNA insertion (LP/LB), lower reaction was performed using primers specific for CaMV35S promoter and *OMA1* cDNA (35S/OMA1) (Table S2).

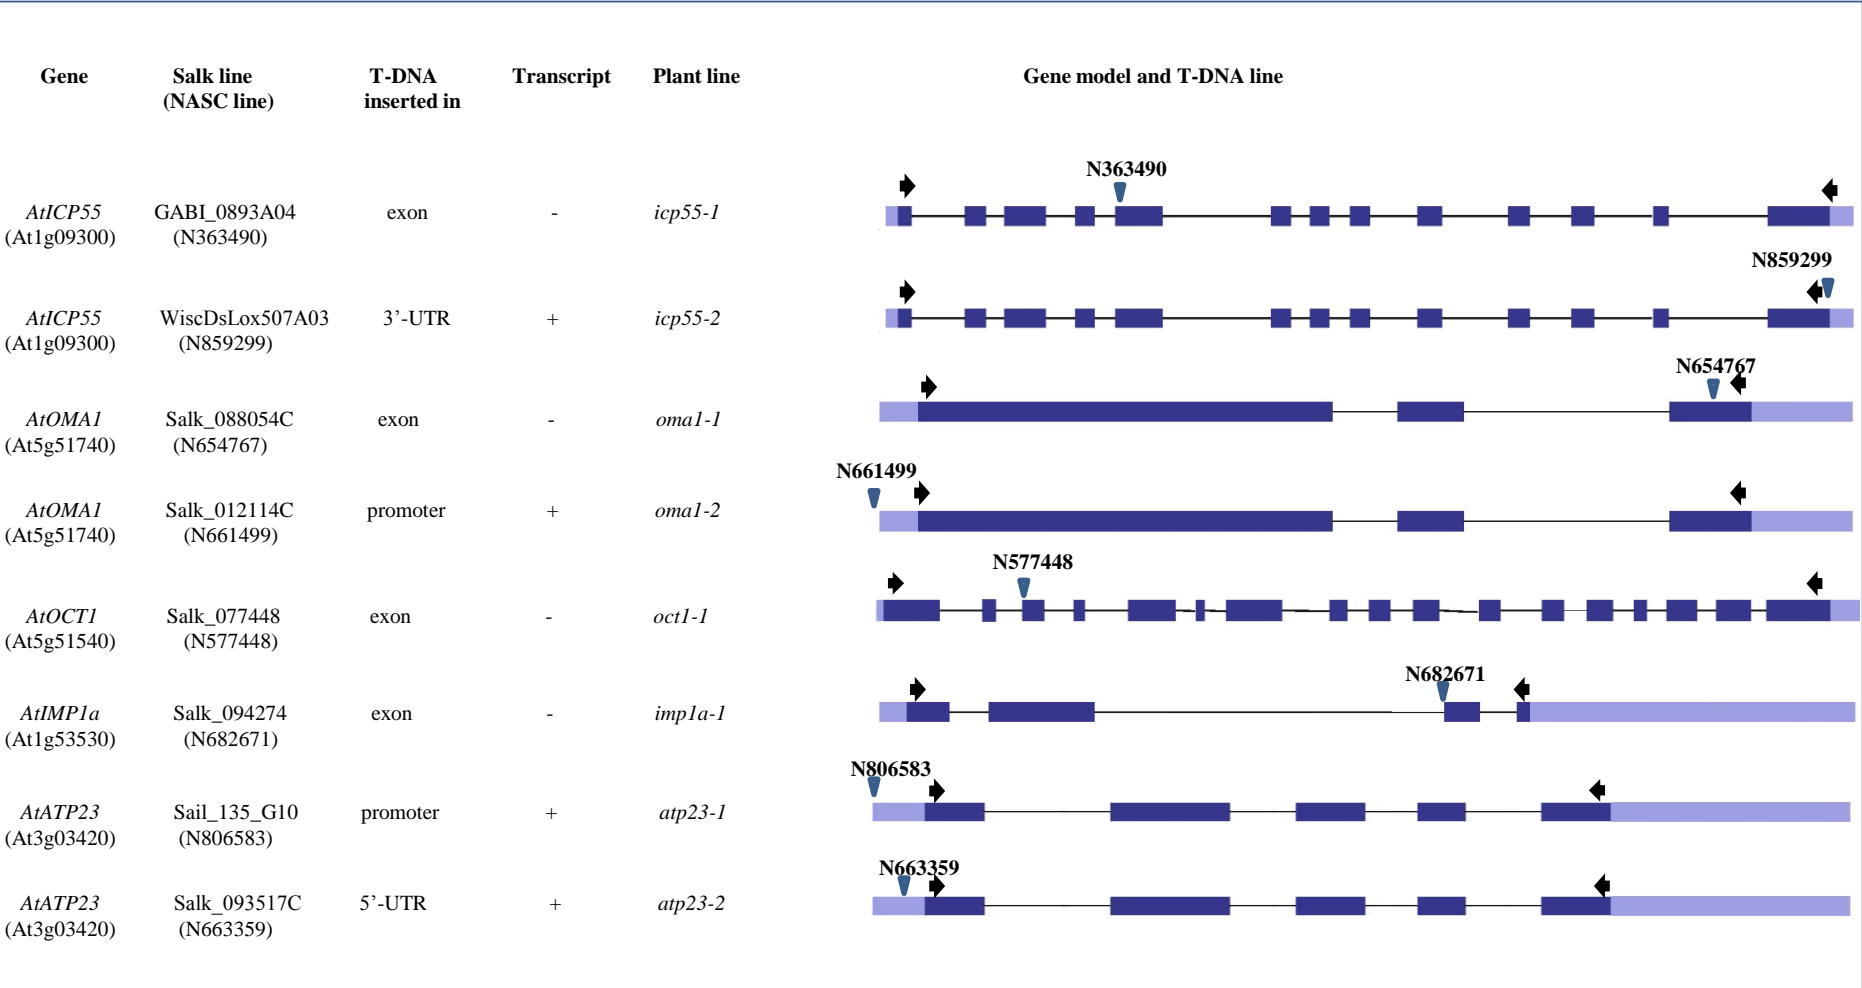

**Figure S4.** Schematic illustration of the T-DNA insertions within genes coding Arabidopsis ATP-independent proteases with respect to DNA sequence and intron/exon regions. Exons are presented by navy blue box, and introns by lines. T-DNA insertion, verified by sequencing, is shown as a triangle with NASc line name above. "+" and "-" indicate the presence or absence of a full length transcript in the mutant, respectively. The positions of primers used for transcript verification are indicated by black arrows.

A

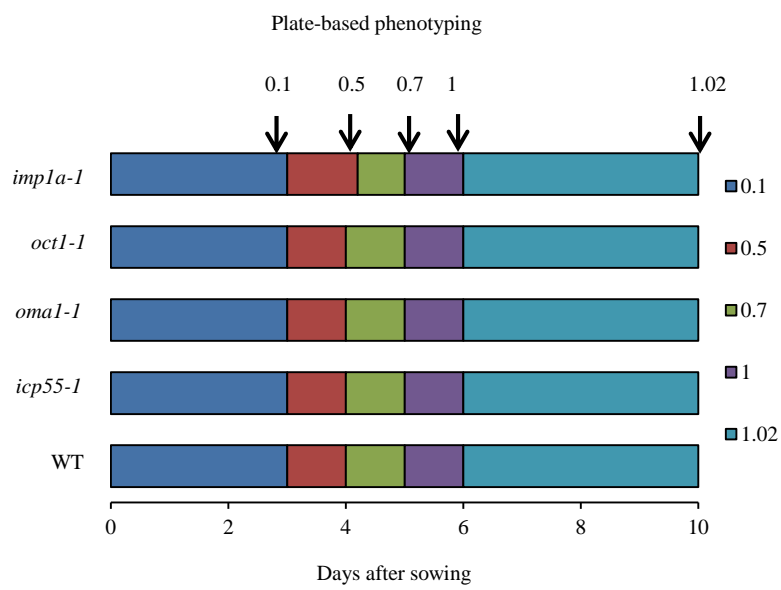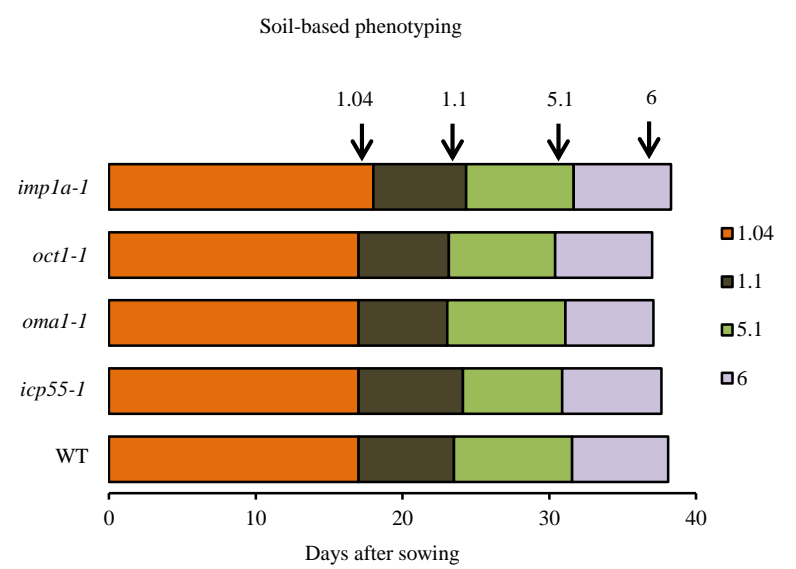

B

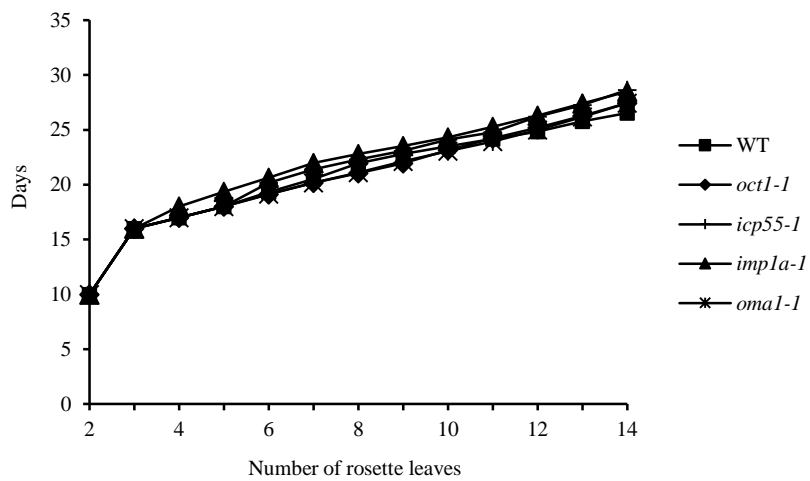

C

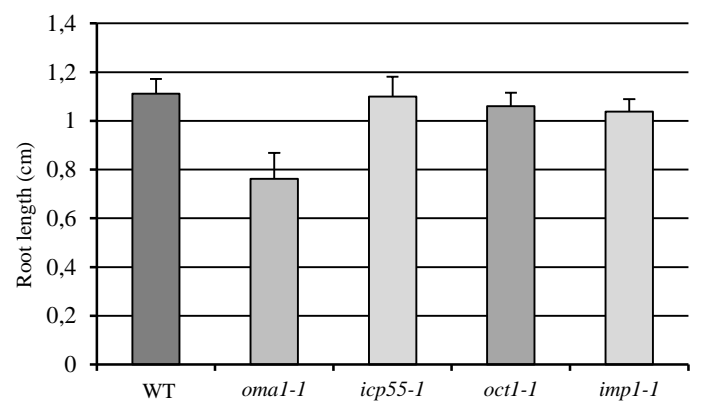

**Figure S5.** Phenotypic analysis of wild-type and T-DNA insertion lines under LD, 22°C condition. **(A)** Growth stage progression analysis for the plate- and soil-grown plants. The end of growth stages was determined according to Boyes *et al.*, (2001). **(B)** Number of rosette leaves >1 mm long produced over time. **(C)** The length of the roots of 5-day-old seedlings. Mean values  $\pm$  SD from at least ten individual plants.

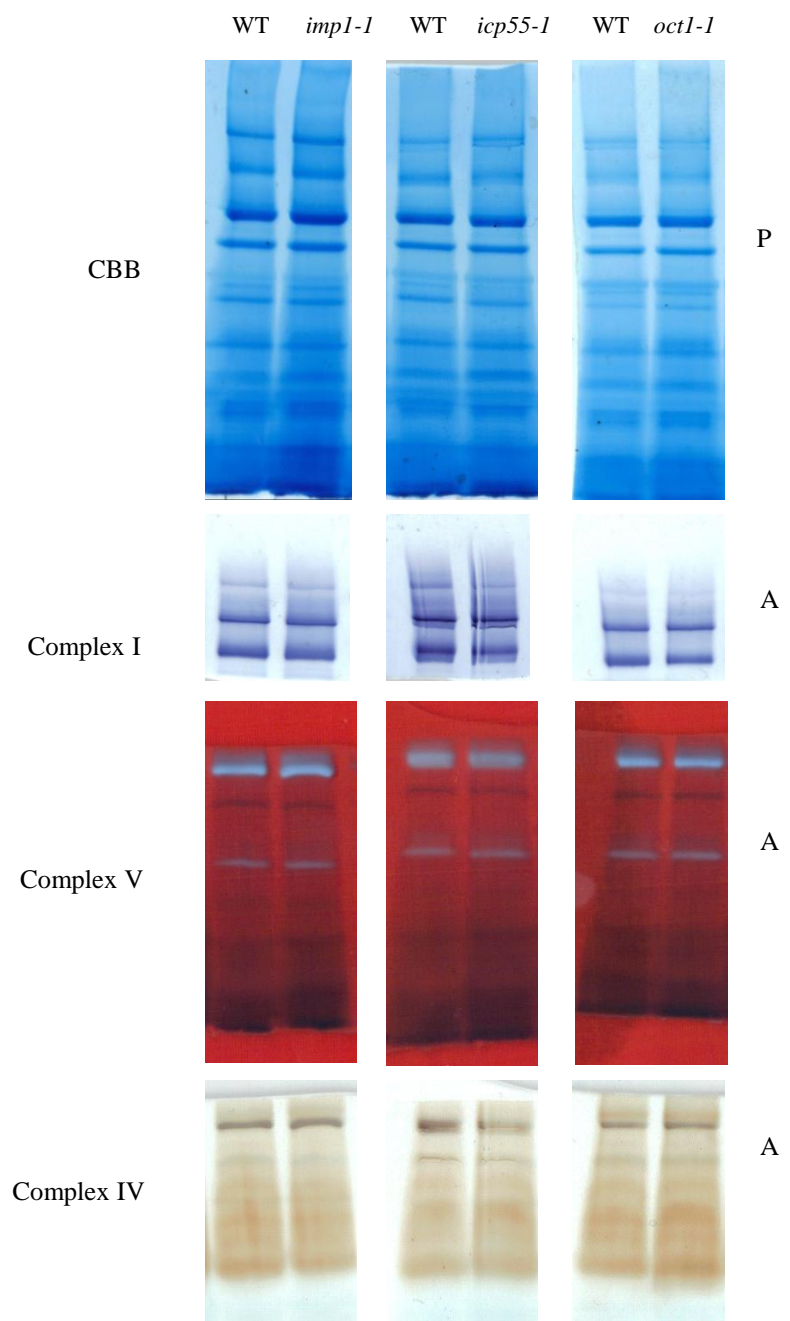

**Figure S6.** In-gel enzyme activity (A) and Coomassie blue (P) staining of mitochondrial OXPHOS complexes separated by blue-native polyacrylamide gel electrophoresis. Mitochondria for BN-PAGE were isolated from 14-day-old plants grown under optimal conditions (LD, 22°C).

A

**BN/SDS - PAGE, 22°C**

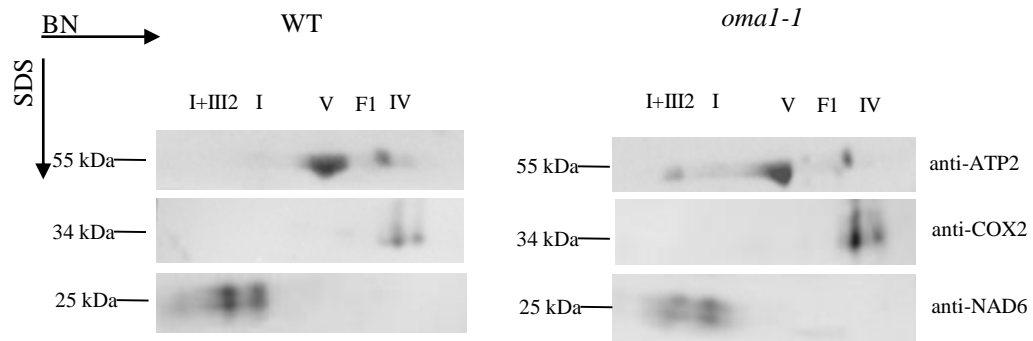

**BN/SDS - PAGE, 30°C**

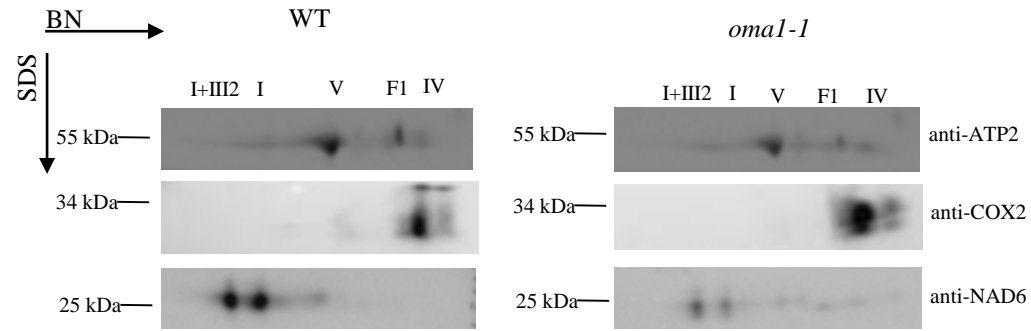

**Figure S7.** BN/SDS-PAGE electrophoresis followed by immunoblotting with antibodies directed against subunits of complexes I, IV and V. Mitochondria were isolated from 14-day-old WT and *oma1-1* plants grown under LD, 22°C and 30°C.

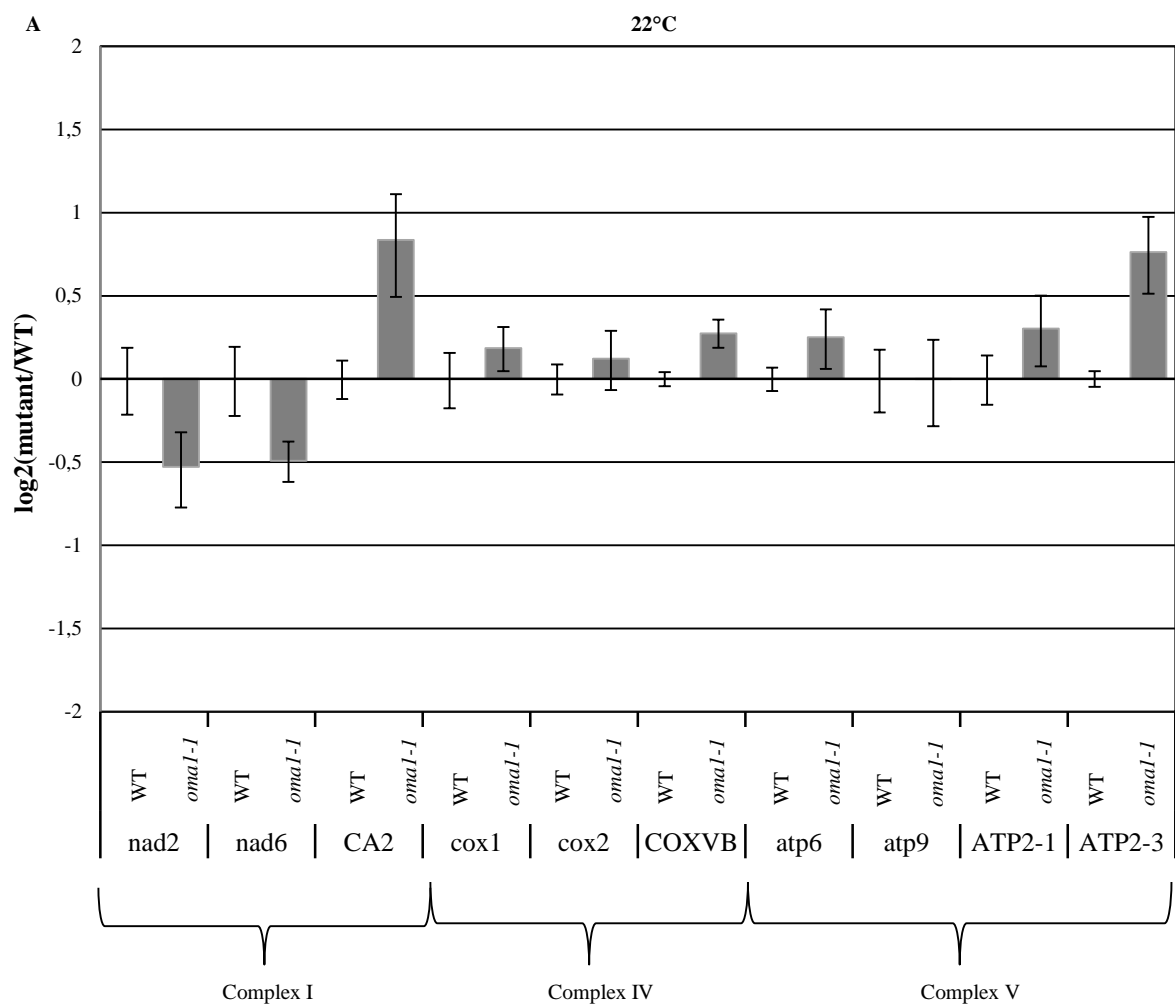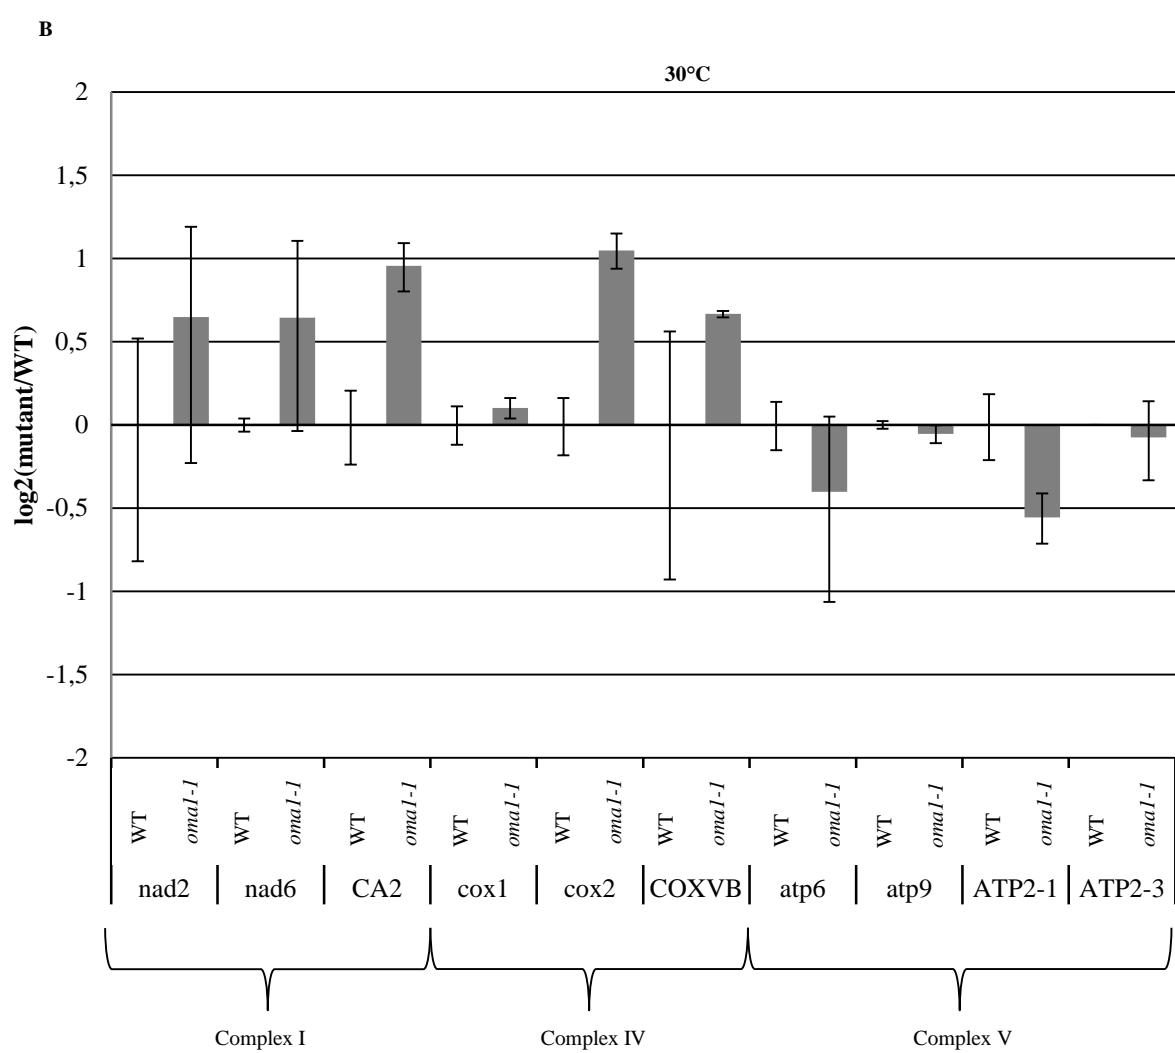

**Figure S8.** The transcript level of the selected genes coding for subunits of the OXPHOS complexes in *oma1-1* mutants grown under LD, 22°C (**A**) and LD 30°C (**B**) compared to the wild-type plants. Analysis was performed by quantitative real-time PCR. Relative abundance of transcripts is expressed as log<sub>2</sub> ratio. Mean values ± SD from three independent experiments are shown.
